# Supplementary material for: Association of Midgut Bacteria and Their Metabolic Pathways with Zika Infection and Insecticide Resistance in Colombian Aedes aegypti Populations
Source: Viruses. 2022 Oct 6;14(10):2197. doi: 10.3390/v14102197 (PMC9609292; doi:10.3390/v14102197)
Supplement: Supplementary file 1 [file viruses-14-02197-s001.zip › Supplementary Table S1.xlsx]

## Sheet: KEGG associated to Zika virus
Pathway	Pathway code	KEGGs	Orthology	Symbol	Name	Change
Metabolic pathways	map01100	25	K00002	AKR1A1, adh	alcohol dehydrogenase (NADP+) [EC:1.1.1.2]	Negative
			K18383	ferB	feruloyl-CoA hydratase/lyase [EC:4.1.2.61]	Negative
			K05884	comC	L-2-hydroxycarboxylate dehydrogenase (NAD+) [EC:1.1.1.337]	Negative
			K00078	DHDH	dihydrodiol dehydrogenase / D-xylose 1-dehydrogenase (NADP) [EC:1.3.1.20 1.1.1.179]	Negative
			K08688	E3.5.3.3	creatinase [EC:3.5.3.3]	Negative
			K19572	CECR1, ADA2	adenosine deaminase CECR1 [EC:3.5.4.4]	Negative
			K13063	phzE	2-amino-4-deoxychorismate synthase [EC:2.6.1.86]	Negative
			K16856	ugl	ureidoglycolate lyase [EC:4.3.2.3]	Negative
			K00635	tgs, wax-dgat	diacylglycerol O-acyltransferase / wax synthase [EC:2.3.1.20 2.3.1.75]	Negative
			K11441	kguK	dehydrogluconokinase [EC:2.7.1.13]	Negative
			K00032	E1.1.1.43	phosphogluconate 2-dehydrogenase [EC:1.1.1.43]	Negative
			K17463	dgaF	2-dehydro-3-deoxy-phosphogluconate aldolase [EC:4.1.2.14]	Negative
			K13501	TRP1	anthranilate synthase / indole-3-glycerol phosphate synthase / phosphoribosylanthranilate isomerase [EC:4.1.3.27 4.1.1.48 5.3.1.24]	Negative
			K00505	TYR	tyrosinase [EC:1.14.18.1]	Negative
			K00106	XDH	xanthine dehydrogenase/oxidase [EC:1.17.1.4 1.17.3.2]	Negative
			K00255	AKADL	long-chain-acyl-CoA dehydrogenase [EC:1.3.8.8]	Negative
			K10816	hcnC	hydrogen cyanide synthase HcnC [EC:1.4.99.5]	Negative
			K10815	hcnB	hydrogen cyanide synthase HcnB [EC:1.4.99.5]	Negative
			K09953	lpxR	lipid A 3-O-deacylase [EC:3.1.1.-]	Negative
			K01905	acdA	acetate---CoA ligase (ADP-forming) subunit alpha [EC:6.2.1.13]	Negative
			K10814	hcnA	hydrogen cyanide synthase HcnA [EC:1.4.99.5]	Negative
			K18974	sul1	dihydropteroate synthase type 1 [EC:2.5.1.15]	Negative
			K19073	DVR	divinyl chlorophyllide a 8-vinyl-reductase [EC:1.3.1.75]	Positive
			K16843	slcC	(S)-sulfolactate dehydrogenase [EC:1.1.1.310]	Positive
			K17230	fcca	cytochrome subunit of sulfide dehydrogenase	Positive
Biosynthesis of secondary metabolites	map01110	11	K00002	AKR1A1, adh	alcohol dehydrogenase (NADP+) [EC:1.1.1.2]	Negative
			K18383	ferB	feruloyl-CoA hydratase/lyase [EC:4.1.2.61]	Negative
			K13063	phzE	2-amino-4-deoxychorismate synthase [EC:2.6.1.86]	Negative
			K13501	TRP1	anthranilate synthase / indole-3-glycerol phosphate synthase / phosphoribosylanthranilate isomerase [EC:4.1.3.27 4.1.1.48 5.3.1.24]	Negative
			K00505	TYR	tyrosinase [EC:1.14.18.1]	Negative
			K00106	XDH	xanthine dehydrogenase/oxidase [EC:1.17.1.4 1.17.3.2]	Negative
			K10816	hcnC	hydrogen cyanide synthase HcnC [EC:1.4.99.5]	Negative
			K10815	hcnB	hydrogen cyanide synthase HcnB [EC:1.4.99.5]	Negative
			K13776	atuH	citronellyl-CoA synthetase [EC:6.2.1.-]	Negative
			K10814	hcnA	hydrogen cyanide synthase HcnA [EC:1.4.99.5]	Negative
			K19073	DVR	divinyl chlorophyllide a 8-vinyl-reductase [EC:1.3.1.75]	Positive
Microbial metabolism in diverse environments	map01120	10	K00002	AKR1A1, adh	alcohol dehydrogenase (NADP+) [EC:1.1.1.2]	Negative
			K15066	ligM	vanillate/3-O-methylgallate O-demethylase [EC:2.1.1.341]	Negative
			K11441	kguK	dehydrogluconokinase [EC:2.7.1.13]	Negative
			K00032	E1.1.1.43	phosphogluconate 2-dehydrogenase [EC:1.1.1.43]	Negative
			K17468	dgaE	D-glucosaminate-6-phosphate ammonia-lyase [EC:4.3.1.29]	Negative
			K17463	dgaF	2-dehydro-3-deoxy-phosphogluconate aldolase [EC:4.1.2.14]	Negative
			K00106	XDH	xanthine dehydrogenase/oxidase [EC:1.17.1.4 1.17.3.2]	Negative
			K01905	acdA	acetate---CoA ligase (ADP-forming) subunit alpha [EC:6.2.1.13]	Negative
			K19190	nboR	nicotine blue oxidoreductase [EC:1.1.1.328]	Negative
			K17230	fcca	cytochrome subunit of sulfide dehydrogenase	Positive
Two-component system	map02020	7	K11630	bceR	two-component system, OmpR family, bacitracin resistance response regulator BceR	Negative
			K12295	comE	two-component system, LytTR family, response regulator ComE	Negative
			K12294	comD	two-component system, LytTR family, sensor histidine kinase ComD [EC:2.7.13.3]	Negative
			K11623	ydfH	two-component system, NarL family, sensor histidine kinase YdfH [EC:2.7.13.3]	Negative
			K07804	pagC	putatice virulence related protein PagC	Negative
			K06597	chpB	chemosensory pili system protein ChpB (putative protein-glutamate methylesterase)	Negative
			K12293	comB	competence factor transport accessory protein ComB	Negative
ABC transporters	map02010	5	K05658	ABCB1, CD243	ATP-binding cassette, subfamily B (MDR/TAP), member 1 [EC:7.6.2.2]	Negative
			K17207	xltA	putative xylitol transport system ATP-binding protein	Negative
			K17205	xltC	putative xylitol transport system substrate-binding protein	Negative
			K10018	occT	octopine/nopaline transport system substrate-binding protein	Negative
			K19349	vga	pleuromutilin/lincosamide/streptogramin A transport system ATP-binding/permease protein	Negative
Quorum sensing	map02024	5	K12295	comE	two-component system, LytTR family, response regulator ComE	Negative
			K19734	expR	LuxR family transcriptional regulator, quorum-sensing system regulator ExpR	Negative
			K13063	phzE	2-amino-4-deoxychorismate synthase [EC:2.6.1.86]	Negative
			K12294	comD	two-component system, LytTR family, sensor histidine kinase ComD [EC:2.7.13.3]	Negative
			K12293	comB	competence factor transport accessory protein ComB	Negative
Biofilm formation - Vibrio cholerae	map05111	4	K10924	mshA	MSHA pilin protein MshA	Negative
			K12276	mshE	MSHA biogenesis protein MshE	Negative
			K10927	mshD	MSHA pilin protein MshD	Negative
			K10926	mshC	MSHA pilin protein MshC	Negative
Pentose phosphate pathway	map00030	4	K11441	kguK	dehydrogluconokinase [EC:2.7.1.13]	Negative
			K00032	E1.1.1.43	phosphogluconate 2-dehydrogenase [EC:1.1.1.43]	Negative
			K17468	dgaE	D-glucosaminate-6-phosphate ammonia-lyase [EC:4.3.1.29]	Negative
			K17463	dgaF	2-dehydro-3-deoxy-phosphogluconate aldolase [EC:4.1.2.14]	Negative
Purine metabolism	map00230	3	K19572	CECR1, ADA2	adenosine deaminase CECR1 [EC:3.5.4.4]	Negative
			K16856	ugl	ureidoglycolate lyase [EC:4.3.2.3]	Negative
			K00106	XDH	xanthine dehydrogenase/oxidase [EC:1.17.1.4 1.17.3.2]	Negative
Glycerolipid metabolism	map00561	2	K00002	AKR1A1, adh	alcohol dehydrogenase (NADP+) [EC:1.1.1.2]	Negative
			K00635	tgs, wax-dgat	diacylglycerol O-acyltransferase / wax synthase [EC:2.3.1.20 2.3.1.75]	Negative
Glycolysis / Gluconeogenesis	map00010	2	K00002	AKR1A1, adh	alcohol dehydrogenase (NADP+) [EC:1.1.1.2]	Negative
			K01905	acdA	acetate---CoA ligase (ADP-forming) subunit alpha [EC:6.2.1.13]	Negative
Pentose and glucuronate interconversions	map00040	2	K00002	AKR1A1, adh	alcohol dehydrogenase (NADP+) [EC:1.1.1.2]	Negative
			K00078	DHDH	dihydrodiol dehydrogenase / D-xylose 1-dehydrogenase (NADP) [EC:1.3.1.20 1.1.1.179]	Negative
Pyruvate metabolism	map00620	2	K00002	AKR1A1, adh	alcohol dehydrogenase (NADP+) [EC:1.1.1.2]	Negative
			K01905	acdA	acetate---CoA ligase (ADP-forming) subunit alpha [EC:6.2.1.13]	Negative
Aminobenzoate degradation	map00627	1	K15066	ligM	vanillate/3-O-methylgallate O-demethylase [EC:2.1.1.341]	Negative
Amyotrophic lateral sclerosis	map05014	1	K09490	HSPA5, BIP	endoplasmic reticulum chaperone BiP [EC:3.6.4.10]	Negative
Antigen processing and presentation	map04612	1	K09490	HSPA5, BIP	endoplasmic reticulum chaperone BiP [EC:3.6.4.10]	Negative
Arginine and proline metabolism	map00330	1	K08688	E3.5.3.3	creatinase [EC:3.5.3.3]	Negative
Ascorbate and aldarate metabolism	map00053	1	K00002	AKR1A1, adh	alcohol dehydrogenase (NADP+) [EC:1.1.1.2]	Negative
Bacterial secretion system	map03070	1	K11913	fha1	type VI secretion system protein	Negative
beta-Lactam resistance	map01501	1	K18699	blaSHV	beta-lactamase class A SHV [EC:3.5.2.6]	Negative
Betalain biosynthesis	map00965	1	K00505	TYR	tyrosinase [EC:1.14.18.1]	Negative
Bile secretion	map04976	1	K05658	ABCB1, CD243	ATP-binding cassette, subfamily B (MDR/TAP), member 1 [EC:7.6.2.2]	Negative
Biofilm formation - Pseudomonas aeruginosa	map02025	1	K11913	fha1	type VI secretion system protein	Negative
Biosynthesis of amino acids	map01230	1	K13501	TRP1	anthranilate synthase / indole-3-glycerol phosphate synthase / phosphoribosylanthranilate isomerase [EC:4.1.3.27 4.1.1.48 5.3.1.24]	Negative
Biosynthesis of cofactors	map01240	1	K00002	AKR1A1, adh	alcohol dehydrogenase (NADP+) [EC:1.1.1.2]	Negative
		1	K05884	comC	L-2-hydroxycarboxylate dehydrogenase (NAD+) [EC:1.1.1.337]	Negative
Biosynthesis of various secondary metabolites - part 2	map00998	1	K18383	ferB	feruloyl-CoA hydratase/lyase [EC:4.1.2.61]	Negative
Caffeine metabolism	map00232	1	K00106	XDH	xanthine dehydrogenase/oxidase [EC:1.17.1.4 1.17.3.2]	Negative
Caprolactam degradation	map00930	1	K00002	AKR1A1, adh	alcohol dehydrogenase (NADP+) [EC:1.1.1.2]	Negative
Cell cycle - Caulobacter	map04112	1	K13586	hfaB	holdfast attachment protein HfaB	Negative
Chemical carcinogenesis - reactive oxygen species	map05208	1	K00002	AKR1A1, adh	alcohol dehydrogenase (NADP+) [EC:1.1.1.2]	Negative
Cyanoamino acid metabolism	map00460	1	K10816	hcnC	hydrogen cyanide synthase HcnC [EC:1.4.99.5]	Negative
		1	K10815	hcnB	hydrogen cyanide synthase HcnB [EC:1.4.99.5]	Negative
		1	K10814	hcnA	hydrogen cyanide synthase HcnA [EC:1.4.99.5]	Negative
Cysteine and methionine metabolism	map00270	1	K16843	slcC	(S)-sulfolactate dehydrogenase [EC:1.1.1.310]	Positive
Degradation of aromatic compounds	map01220	1	K00002	AKR1A1, adh	alcohol dehydrogenase (NADP+) [EC:1.1.1.2]	Negative
DNA replication	map03030	1	K14159	rnhA-dnaQ	ribonuclease HI / DNA polymerase III subunit epsilon [EC:3.1.26.4 2.7.7.7]	Negative
Drug metabolism - other enzymes	map00983	1	K00106	XDH	xanthine dehydrogenase/oxidase [EC:1.17.1.4 1.17.3.2]	Negative
Fatty acid degradation	map00071	1	K00255	AKADL	long-chain-acyl-CoA dehydrogenase [EC:1.3.8.8]	Negative
Fatty acid metabolism	map01212	1	K00255	AKADL	long-chain-acyl-CoA dehydrogenase [EC:1.3.8.8]	Negative
Folate biosynthesis	map00790	1	K18974	sul1	dihydropteroate synthase type 1 [EC:2.5.1.15]	Negative
Gastric cancer	map05226	1	K05658	ABCB1, CD243	ATP-binding cassette, subfamily B (MDR/TAP), member 1 [EC:7.6.2.2]	Negative
Geraniol degradation	map00281	1	K13776	atuH	citronellyl-CoA synthetase [EC:6.2.1.-]	Negative
Glutathione metabolism	map00480	1	K00032	E1.1.1.43	phosphogluconate 2-dehydrogenase [EC:1.1.1.43]	Negative
Glycine, serine and threonine metabolism	map00260	1	K08688	E3.5.3.3	creatinase [EC:3.5.3.3]	Negative
Homologous recombination	map03440	1	K14159	rnhA-dnaQ	ribonuclease HI / DNA polymerase III subunit epsilon [EC:3.1.26.4 2.7.7.7]	Negative
Isoquinoline alkaloid biosynthesis	map00950	1	K00505	TYR	tyrosinase [EC:1.14.18.1]	Negative
Lipid and atherosclerosis	map05417	1	K09490	HSPA5, BIP	endoplasmic reticulum chaperone BiP [EC:3.6.4.10]	Negative
Lipopolysaccharide biosynthesis	map00540	1	K09953	lpxR	lipid A 3-O-deacylase [EC:3.1.1.-]	Negative
Melanogenesis	map04916	1	K00505	TYR	tyrosinase [EC:1.14.18.1]	Negative
Metabolism of xenobiotics by cytochrome P450	map00980	1	K00078	DHDH	dihydrodiol dehydrogenase / D-xylose 1-dehydrogenase (NADP) [EC:1.3.1.20 1.1.1.179]	Negative
Methane metabolism	map00680	1	K05884	comC	L-2-hydroxycarboxylate dehydrogenase (NAD+) [EC:1.1.1.337]	Negative
MicroRNAs in cancer	map05206	1	K05658	ABCB1, CD243	ATP-binding cassette, subfamily B (MDR/TAP), member 1 [EC:7.6.2.2]	Negative
Mismatch repair	map03430	1	K14159	rnhA-dnaQ	ribonuclease HI / DNA polymerase III subunit epsilon [EC:3.1.26.4 2.7.7.7]	Negative
Nicotinate and nicotinamide metabolism	map00760	1	K19190	nboR	nicotine blue oxidoreductase [EC:1.1.1.328]	Negative
Other glycan degradation	map00511	1	K01227	ENGASE	mannosyl-glycoprotein endo-beta-N-acetylglucosaminidase [EC:3.2.1.96]	Negative
Parkinson disease	map05012	1	K09490	HSPA5, BIP	endoplasmic reticulum chaperone BiP [EC:3.6.4.10]	Negative
Pathways of neurodegeneration - multiple diseases	map05022	1	K09490	HSPA5, BIP	endoplasmic reticulum chaperone BiP [EC:3.6.4.10]	Negative
Peroxisome	map04146	1	K00106	XDH	xanthine dehydrogenase/oxidase [EC:1.17.1.4 1.17.3.2]	Negative
Phenazine biosynthesis	map00405	1	K13063	phzE	2-amino-4-deoxychorismate synthase [EC:2.6.1.86]	Negative
Phenylalanine, tyrosine and tryptophan biosynthesis	map00400	1	K13501	TRP1	anthranilate synthase / indole-3-glycerol phosphate synthase / phosphoribosylanthranilate isomerase [EC:4.1.3.27 4.1.1.48 5.3.1.24]	Negative
Porphyrin and chlorophyll metabolism	map00860	1	K19073	DVR	divinyl chlorophyllide a 8-vinyl-reductase [EC:1.3.1.75]	Positive
PPAR signaling pathway	map03320	1	K00255	AKADL	long-chain-acyl-CoA dehydrogenase [EC:1.3.8.8]	Negative
Prion disease	map05020	1	K09490	HSPA5, BIP	endoplasmic reticulum chaperone BiP [EC:3.6.4.10]	Negative
Propanoate metabolism	map00640	1	K01905	acdA	acetate---CoA ligase (ADP-forming) subunit alpha [EC:6.2.1.13]	Negative
Protein export	map03060	1	K09490	HSPA5, BIP	endoplasmic reticulum chaperone BiP [EC:3.6.4.10]	Negative
Protein processing in endoplasmic reticulum	map04141	1	K09490	HSPA5, BIP	endoplasmic reticulum chaperone BiP [EC:3.6.4.10]	Negative
Sulfur metabolism	map00920	1	K17230	fcca	cytochrome subunit of sulfide dehydrogenase	Positive
Thermogenesis	map04714	1	K18164	NDUFAF7	NADH dehydrogenase [ubiquinone] 1 alpha subcomplex assembly factor 7	Negative
Thyroid hormone synthesis	map04918	1	K09490	HSPA5, BIP	endoplasmic reticulum chaperone BiP [EC:3.6.4.10]	Negative
Tyrosine metabolism	map00350	1	K00505	TYR	tyrosinase [EC:1.14.18.1]	Negative
None		45	K12278	mshG	MSHA biogenesis protein MshG	Negative
			K12283	mshM	MSHA biogenesis protein MshM	Negative
			K12284	mshN	MSHA biogenesis protein MshN	Negative
			K12279	mshI	MSHA biogenesis protein MshI	Negative
			K12286	mshP	MSHA biogenesis protein MshP	Negative
			K12285	mshO	MSHA biogenesis protein MshO	Negative
			K12280	mshJ	MSHA biogenesis protein MshJ	Negative
			K19242	citR	LysR family transcriptional regulator, repressor for citA	Negative
			K10677	E4.2.2.17	inulin fructotransferase (DFA-I-forming) [EC:4.2.2.17]	Negative
			K01269	yhfE	aminopeptidase [EC:3.4.11.-]	Negative
			K19134	csx10	CRISPR-associated protein Csx10	Negative
			K07128	K07128	uncharacterized protein	Negative
			K15976	K15976	putative NAD(P)H nitroreductase [EC:1.-.-.-]	Negative
			K03653	K03653	N-glycosylase/DNA lyase [EC:3.2.2.- 4.2.99.18]	Negative
			K14664	ILR1	IAA-amino acid hydrolase [EC:3.5.1.-]	Negative
			K19694	chiS	two-component system, sensor histidine kinase ChiS	Negative
			K02442	glpM	membrane protein GlpM	Negative
			K09981	K09981	uncharacterized protein	Negative
			K08085	fimU	type IV fimbrial biogenesis protein FimU	Negative
			K04053	yscI, sctI	type III secretion protein I	Negative
			K16229	mps2	glycopeptidolipid biosynthesis protein	Negative
			K16078	ail	attachment invasion locus protein	Negative
			K19592	golS	MerR family transcriptional regulator, gold-responsive activator of gol and ges genes	Negative
			K04054	yscK, sctK	type III secretion protein K	Negative
			K04051	yscG, sctG	type III secretion protein G	Negative
			K04049	yscB, sctB	type III secretion protein B	Negative
			K19595	gesA, mexP	membrane fusion protein, gold/copper resistance efflux system	Negative
			K19594	gesB, mexQ	gold/copper resistance efflux pump	Negative
			K01387	colA	microbial collagenase [EC:3.4.24.3]	Negative
			K18642	creS	crescentin	Negative
			K19047	tetC	TetR/AcrR family transcriptional regulator, repressor of tetCD	Negative
			K19300	aph3-II	aminoglycoside 3'-phosphotransferase II [EC:2.7.1.95]	Negative
			K18567	pbuE	MFS transporter, DHA1 family, purine base/nucleoside efflux pump	Negative
			K00518	sodN	nickel superoxide dismutase [EC:1.15.1.1]	Negative
			K18958	whiB7	WhiB family transcriptional regulator, redox-sensing transcriptional regulator	Negative
			K09818	ABC.MN.S	manganese/iron transport system substrate-binding protein	Negative
			K19059	merE	mercuric ion transport protein	Negative
			K07064	K07064	uncharacterized protein	Negative
			K12227	K12227, traL	TraL protein	Positive
			K12211	icmG, dotF	intracellular multiplication protein IcmG	Positive
			K12205	dotD, traH	defect in organelle trafficking protein DotD	Positive
			K18305	mexG	transmembrane protein	Positive
			K09146	K09146	uncharacterized protein	Positive
			K18235	vgb	virginiamycin B lyase [EC:4.2.99.-]	Positive
			K07492	K07492	putative transposase	Positive
