# Supplementary material for: Association of Midgut Bacteria and Their Metabolic Pathways with Zika Infection and Insecticide Resistance in Colombian Aedes aegypti Populations
Source: Viruses. 2022 Oct 6;14(10):2197. doi: 10.3390/v14102197 (PMC9609292; doi:10.3390/v14102197)
Supplement: Supplementary file 1 [file viruses-14-02197-s001.zip › Supplementary Table S2.xlsx]

## Sheet: KEGG associated to resistance
Pathway	Pathway code	KEGGs	Orthology	Symbol	Name	Change
Metabolic pathways	map01100	25	K07546	bbsH	E-phenylitaconyl-CoA hydratase [EC:4.2.1.-]	Negative
			K16856	ugl	ureidoglycolate lyase [EC:4.3.2.3]	Negative
			K14470	mct	2-methylfumaryl-CoA isomerase [EC:5.4.1.3]	Positive
			K19073	DVR	divinyl chlorophyllide a 8-vinyl-reductase [EC:1.3.1.75]	Positive
			K17230	fcca	cytochrome subunit of sulfide dehydrogenase	Positive
			K14259	kdaD, xacE, kdxD	2-dehydro-3-deoxy-D-arabinonate dehydratase [EC:4.2.1.141]	Positive
			K19744	dauB	L-arginine dehydrogenase [EC:1.4.1.25]	Positive
			K16164	K16164	acylpyruvate hydrolase [EC:3.7.1.5]	Positive
			K18974	sul1	dihydropteroate synthase type 1 [EC:2.5.1.15]	Positive
			K18289	ict-P	itaconate CoA-transferase [EC:2.8.3.- 2.8.3.22]	Positive
			K18383	ferB	feruloyl-CoA hydratase/lyase [EC:4.1.2.61]	Positive
			K18291	ichP	itaconyl-CoA hydratase / mesaconyl-C4 CoA hydratase [EC:4.2.1.56 4.2.1.-]	Positive
			K10814	hcnA	hydrogen cyanide synthase HcnA [EC:1.4.99.5]	Positive
			K15983	kshB	3-ketosteroid 9alpha-monooxygenase subunit B [EC:1.14.15.30]	Positive
			K14268	davT, gabT	5-aminovalerate/4-aminobutyrate aminotransferase [EC:2.6.1.48 2.6.1.19]	Positive
			K00466	iaaM	tryptophan 2-monooxygenase [EC:1.13.12.3]	Positive
			K03715	MGD	1,2-diacylglycerol 3-beta-galactosyltransferase [EC:2.4.1.46]	Positive
			K19291	alg44	mannuronan synthase [EC:2.4.1.33]	Positive
			K19290	alg8	mannuronan synthase [EC:2.4.1.33]	Positive
			K01795	algG	mannuronan 5-epimerase [EC:5.1.3.37]	Positive
			K12252	aruH	arginine:pyruvate transaminase [EC:2.6.1.84]	Positive
			K08685	qhpA	quinohemoprotein amine dehydrogenase [EC:1.4.9.1]	Positive
			K15228	mauA	methylamine dehydrogenase light chain [EC:1.4.9.1]	Positive
			K00316	spdH	spermidine dehydrogenase [EC:1.5.99.6]	Positive
			K15230	mauB	methylamine dehydrogenase heavy chain [EC:1.4.9.1]	Positive
Microbial metabolism in diverse environments	map01120	9	K07546	bbsH	E-phenylitaconyl-CoA hydratase [EC:4.2.1.-]	Negative
			K14470	mct	2-methylfumaryl-CoA isomerase [EC:5.4.1.3]	Positive
			K17230	fcca	cytochrome subunit of sulfide dehydrogenase	Positive
			K16164	K16164	acylpyruvate hydrolase [EC:3.7.1.5]	Positive
			K15983	kshB	3-ketosteroid 9alpha-monooxygenase subunit B [EC:1.14.15.30]	Positive
			K14268	davT, gabT	5-aminovalerate/4-aminobutyrate aminotransferase [EC:2.6.1.48 2.6.1.19]	Positive
			K08685	qhpA	quinohemoprotein amine dehydrogenase [EC:1.4.9.1]	Positive
			K15228	mauA	methylamine dehydrogenase light chain [EC:1.4.9.1]	Positive
			K15231	mauB	methylamine dehydrogenase heavy chain [EC:1.4.9.1]	Positive
Two-component system	map02020	9	K07651	resE	two-component system, OmpR family, sensor histidine kinase ResE [EC:2.7.13.3]	Negative
			K11603	mntA	manganese transport system ATP-binding protein [EC:7.2.2.5]	Positive
			K11602	mntB	manganese transport system permease protein	Positive
			K11601	mntC	manganese transport system substrate-binding protein	Positive
			K19609	pfeS, pirS	two-component system, OmpR family, sensor histidine kinase PfeS [EC:2.7.13.3]	Positive
			K17061	aauR	two-component system, response regulator AauR	Positive
			K17060	aauS	two-component system, sensor histidine kinase AauS [EC:2.7.13.3]	Positive
			K11383	kinB	two-component system, NtrC family, sensor histidine kinase KinB [EC:2.7.13.3]	Positive
			K19610	pfeR, pirR	two-component system, OmpR family, response regulator PfeR	Positive
ABC transporters	map02010	4	K11603	mntA	manganese transport system ATP-binding protein [EC:7.2.2.5]	Positive
			K11602	mntB	manganese transport system permease protein	Positive
			K11601	mntC	manganese transport system substrate-binding protein	Positive
			K15496	wtpB	molybdate/tungstate transport system permease protein	Positive
Biosynthesis of secondary metabolites	map01110	3	K19073	DVR	divinyl chlorophyllide a 8-vinyl-reductase [EC:1.3.1.75]	Positive
			K18383	ferB	feruloyl-CoA hydratase/lyase [EC:4.1.2.61]	Positive
			K10814	hcnA	hydrogen cyanide synthase HcnA [EC:1.4.99.5]	Positive
Fructose and mannose metabolism	map00051	3	K19291	alg44	mannuronan synthase [EC:2.4.1.33]	Positive
			K19290	alg8	mannuronan synthase [EC:2.4.1.33]	Positive
			K01795	algG	mannuronan 5-epimerase [EC:5.1.3.37]	Positive
Methane metabolism	map00680	3	K08685	qhpA	quinohemoprotein amine dehydrogenase [EC:1.4.9.1]	Positive
			K15228	mauA	methylamine dehydrogenase light chain [EC:1.4.9.1]	Positive
			K15229	mauB	methylamine dehydrogenase heavy chain [EC:1.4.9.1]	Positive
Arginine and proline metabolism	map00330	2	K12252	aruH	arginine:pyruvate transaminase [EC:2.6.1.84]	Positive
			K00316	spdH	spermidine dehydrogenase [EC:1.5.99.6]	Positive
Biofilm formation - Pseudomonas aeruginosa	map02025	2	K11913	fha1	type VI secretion system protein	Positive
			K19291	alg44	mannuronan synthase [EC:2.4.1.33]	Positive
C5-Branched dibasic acid metabolism	map00660	2	K18289	ict-P	itaconate CoA-transferase [EC:2.8.3.- 2.8.3.22]	Positive
			K18291	ichP	itaconyl-CoA hydratase / mesaconyl-C4 CoA hydratase [EC:4.2.1.56 4.2.1.-]	Positive
Alanine, aspartate and glutamate metabolism	map00250	1	K14268	davT, gabT	5-aminovalerate/4-aminobutyrate aminotransferase [EC:2.6.1.48 2.6.1.19]	Positive
Ascorbate and aldarate metabolism	map00053	1	K14259	kdaD, xacE, kdxD	2-dehydro-3-deoxy-D-arabinonate dehydratase [EC:4.2.1.141]	Positive
Bacterial secretion system	map03070	1	K11913	fha1	type VI secretion system protein	Positive
beta-Alanine metabolism	map00410	1	K00316	spdH	spermidine dehydrogenase [EC:1.5.99.6]	Positive
beta-Lactam resistance	map01501	1	K19215	blaACT_MIR	beta-lactamase class C ACT/MIR [EC:3.5.2.6]	Positive
Biosynthesis of various secondary metabolites - part 2	map00998	1	K18383	ferB	feruloyl-CoA hydratase/lyase [EC:4.1.2.61]	Positive
Butanoate metabolism	map00650	1	K14268	davT, gabT	5-aminovalerate/4-aminobutyrate aminotransferase [EC:2.6.1.48 2.6.1.19]	Positive
Calcium signaling pathway	map04020	1	K00476	ASPH	aspartate beta-hydroxylase [EC:1.14.11.16]	Positive
Carbon fixation pathways in prokaryotes	map00720	1	K14470	mct	2-methylfumaryl-CoA isomerase [EC:5.4.1.3]	Positive
Carbon metabolism	map01200	1	K14470	mct	2-methylfumaryl-CoA isomerase [EC:5.4.1.3]	Positive
Cardiac muscle contraction	map04260	1	K00476	ASPH	aspartate beta-hydroxylase [EC:1.14.11.16]	Positive
Cyanoamino acid metabolism	map00460	1	K10814	hcnA	hydrogen cyanide synthase HcnA [EC:1.4.99.5]	Positive
D-Amino acid metabolism	map00470	1	K19744	dauB	L-arginine dehydrogenase [EC:1.4.1.25]	Positive
Degradation of aromatic compounds	map01220	1	K07546	bbsH	E-phenylitaconyl-CoA hydratase [EC:4.2.1.-]	Negative
Folate biosynthesis	map00790	1	K18974	sul1	dihydropteroate synthase type 1 [EC:2.5.1.15]	Positive
Glycerolipid metabolism	map00561	1	K03715	MGD	1,2-diacylglycerol 3-beta-galactosyltransferase [EC:2.4.1.46]	Positive
Lysine degradation	map00310	1	K14268	davT, gabT	5-aminovalerate/4-aminobutyrate aminotransferase [EC:2.6.1.48 2.6.1.19]	Positive
Pentose and glucuronate interconversions	map00040	1	K14259	kdaD, xacE, kdxD	2-dehydro-3-deoxy-D-arabinonate dehydratase [EC:4.2.1.141]	Positive
Porphyrin and chlorophyll metabolism	map00860	1	K19073	DVR	divinyl chlorophyllide a 8-vinyl-reductase [EC:1.3.1.75]	Positive
Purine metabolism	map00230	1	K16856	ugl	ureidoglycolate lyase [EC:4.3.2.3]	Negative
Steroid degradation	map00984	1	K15983	kshB	3-ketosteroid 9alpha-monooxygenase subunit B [EC:1.14.15.30]	Positive
Sulfur metabolism	map00920	1	K17230	fcca	cytochrome subunit of sulfide dehydrogenase	Positive
Thermogenesis	map04714	1	K18164	NDUFAF7	NADH dehydrogenase [ubiquinone] 1 alpha subcomplex assembly factor 7	Positive
Toluene degradation	map00623	1	K07546	bbsH	E-phenylitaconyl-CoA hydratase [EC:4.2.1.-]	Negative
Tryptophan metabolism	map00380	1	K00466	iaaM	tryptophan 2-monooxygenase [EC:1.13.12.3]	Positive
Tyrosine metabolism	map00350	1	K16164	K16164	acylpyruvate hydrolase [EC:3.7.1.5]	Positive
None		47	K00518	sodN	nickel superoxide dismutase [EC:1.15.1.1]	Negative
			K18916	ptxD	phosphonate dehydrogenase [EC:1.20.1.1]	Positive
			K12242	pchC	pyochelin biosynthesis protein PchC	Positive
			K19169	dndB	DNA sulfur modification protein DndB	Positive
			K12222	icmT, traK	intracellular multiplication protein IcmT	Positive
			K12203	dotB, traJ	defect in organelle trafficking protein DotB [EC:7.2.4.8]	Positive
			K19047	tetC	TetR/AcrR family transcriptional regulator, repressor of tetCD	Positive
			K08085	fimU	type IV fimbrial biogenesis protein FimU	Positive
			K16167	bpsA, srsA, pks11, pks10	alkylresorcinol/alkylpyrone synthase	Positive
			K18195	RGL4, rhiE	rhamnogalacturonan endolyase [EC:4.2.2.23]	Positive
			K19300	aph3-II	aminoglycoside 3'-phosphotransferase II [EC:2.7.1.95]	Positive
			K12217	icmO, trbC, dotL	intracellular multiplication protein IcmO [EC:7.2.4.8]	Positive
			K13001	wbyK	mannosyltransferase [EC:2.4.1.-]	Positive
			K16299	No entry found	No aplica	Positive
			K12206	icmB, dotO	intracellular multiplication protein IcmB [EC:7.2.4.8]	Positive
			K17869	nox2	NADH oxidase (H2O-forming) [EC:1.6.3.4]	Positive
			K12246	neuS, siaD	poly-alpha-2,8 sialosyl sialyltransferase [EC:2.4.-.-]	Positive
			K11008	cnf1	cytotoxic necrotizing factor 1	Positive
			K12523	papK	minor pilin subunit PapK	Positive
			K12522	papG	adhesin PapG	Positive
			K12521	papF	minor pilin subunit PapF	Positive
			K12520	papE	minor pilin subunit PapE	Positive
			K12519	papD	chaperone protein PapD	Positive
			K12518	papC	outer membrane usher protein PapC	Positive
			K08985	K08985	putative lipoprotein	Positive
			K18555	qnr, mcbG	fluoroquinolone resistance protein	Positive
			K18297	mexT	LysR family transcriptional regulator, mexEF-oprN operon transcriptional activator	Positive
			K19296	algF	alginate O-acetyltransferase complex protein AlgF	Positive
			K19293	algX	alginate biosynthesis protein AlgX	Positive
			K19292	algK	alginate biosynthesis protein AlgK	Positive
			K16081	algE	alginate production protein	Positive
			K12517	papA	major pilin subunit PapA	Positive
			K11005	hlyA	hemolysin A	Positive
			K13007	wbpL	glycosyltransferase WbpL [EC:2.4.1.-]	Positive
			K02442	glpM	membrane protein GlpM	Positive
			K08675	PRSS15, PIM1	ATP-dependent Lon protease [EC:3.4.21.53]	Positive
			K18296	mexD	multidrug efflux pump	Positive
			K08721	oprJ	outer membrane protein, multidrug efflux system	Positive
			K19130	csy4, cas6f	CRISPR-associated endonuclease Csy4 [EC:3.1.-.-]	Positive
			K19127	csy1	CRISPR-associated protein Csy1	Positive
			K17736	cdhR	AraC family transcriptional regulator, carnitine catabolism transcriptional activator	Positive
			K06421	sspD	small acid-soluble spore protein D (minor alpha/beta-type SASP)	Positive
			K18294	nfxB	TetR/AcrR family transcriptional regulator, mexCD-oprJ operon repressor	Positive
			K19128	csy2	CRISPR-associated protein Csy2	Positive
			K19129	csy3	CRISPR-associated protein Csy3	Positive
			K18540	ramA	(R)-amidase [EC:3.5.1.100]	Positive
			K12549	lapA	surface adhesion protein	Positive
