# Supplementary material for: Association of Midgut Bacteria and Their Metabolic Pathways with Zika Infection and Insecticide Resistance in Colombian Aedes aegypti Populations
Source: Viruses. 2022 Oct 6;14(10):2197. doi: 10.3390/v14102197 (PMC9609292; doi:10.3390/v14102197)
Supplement: Supplementary file 1 [file viruses-14-02197-s001.zip › Supplementary_Material_Paper ZIKV 20_08_2022.pdf]

## Supplementary Material

### Supplementary Figures

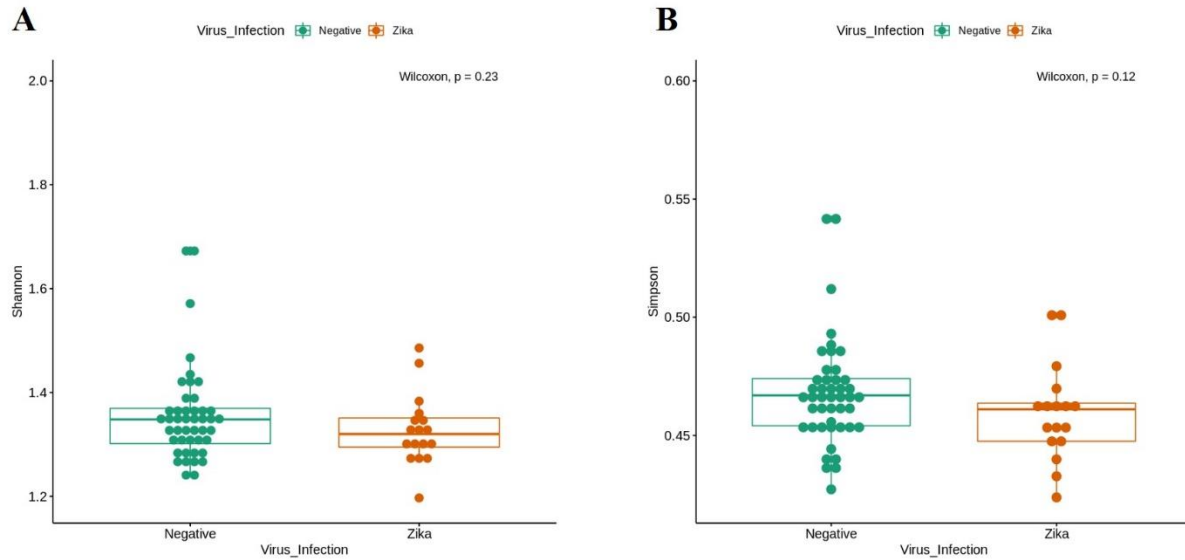

**Supplementary Figure S1.** Comparison of bacterial diversity in the midgut of ZIKV-infected and non-infected *Ae. aegypti*. Shannon (A) and Simpson (B) alpha diversity indices are shown. Wilcoxon rank-sum tests were conducted under R statistical software version 4.1.2. Groups were not significantly different when  $p > 0.05$ .

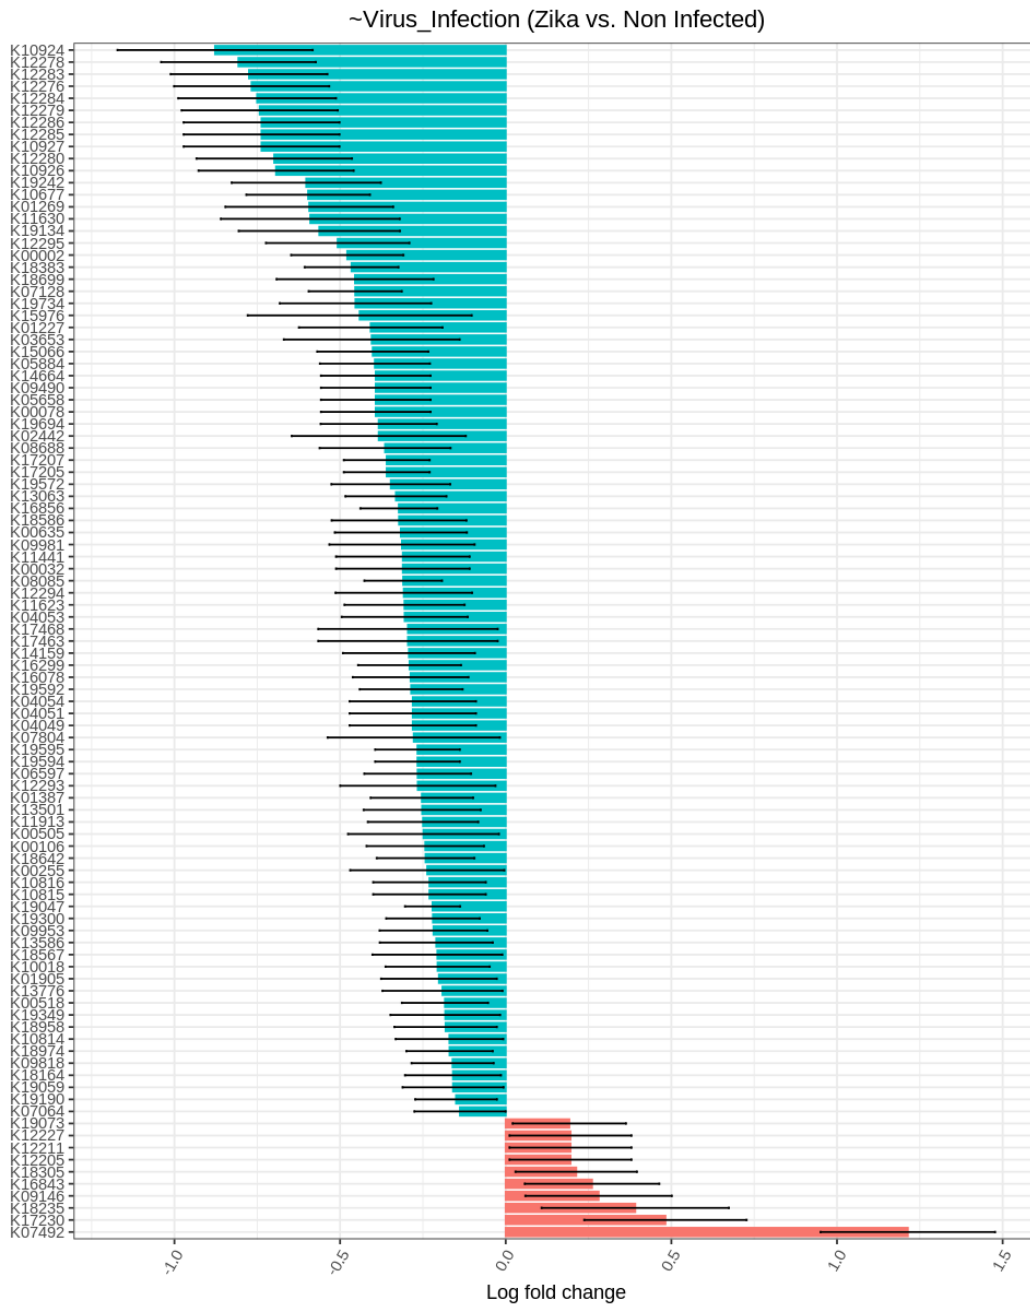

**Supplementary Figure S2.** KEGG genes with significantly different abundance in *Ae. aegypti* midguts stratified by ZIKV infection using ANCOM-BC ( $p < 0.05$ ).

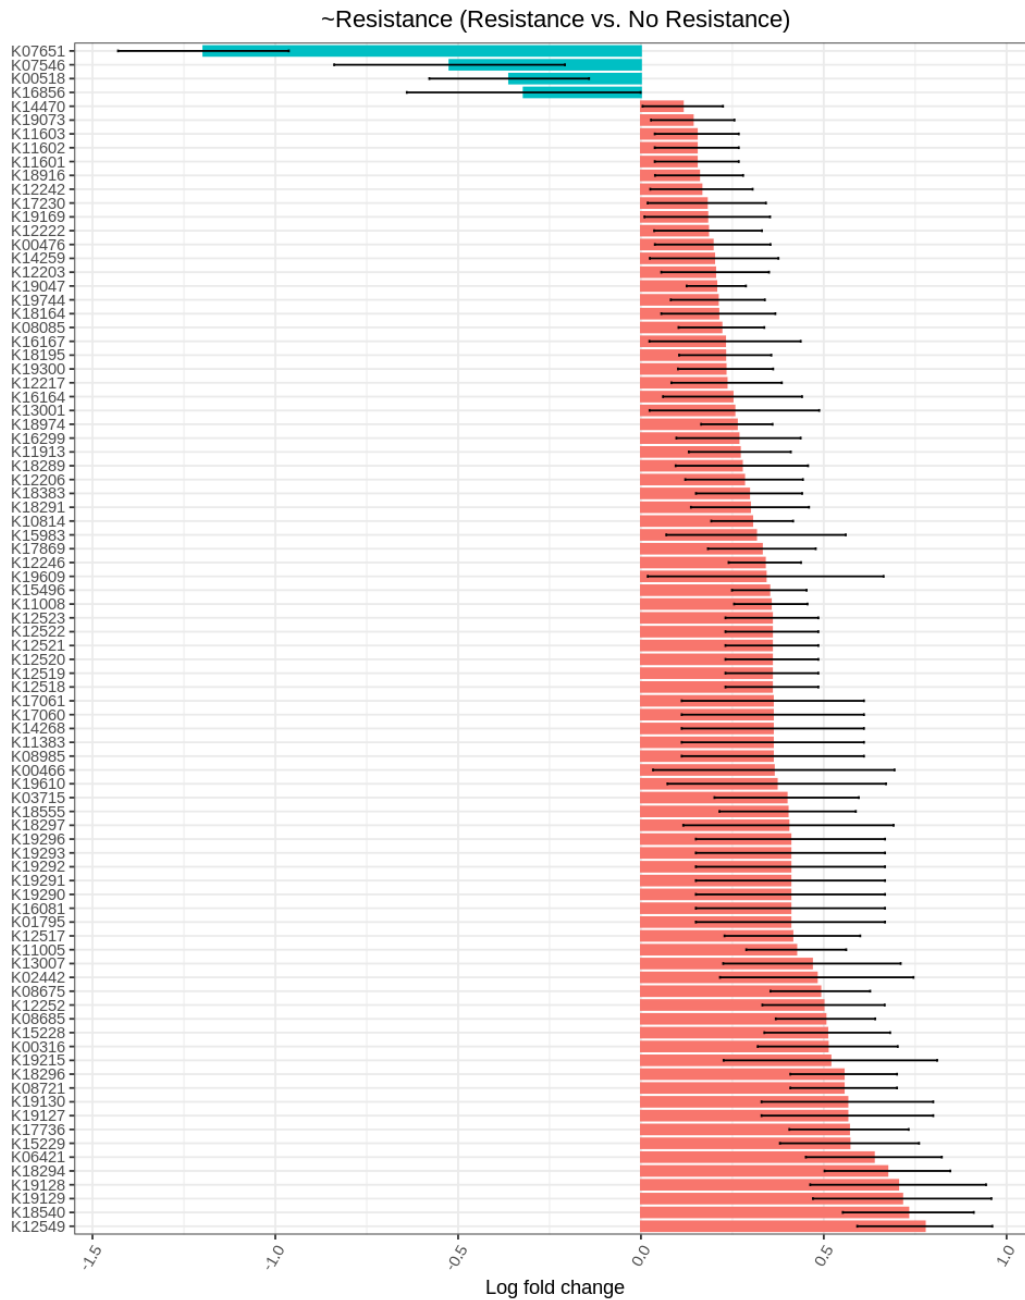

**Supplementary Figure S3.** KEGG genes with significantly different abundance in *Ae. aegypti* midguts stratified by lambda-cyhalothrin resistance using ANCOM-BC ( $p < 0.05$ ).

## Supplementary Tables

**Supplementary Table S1.** Principal KEGG pathways associated with ZIKV infection in *Ae. aegypti* midguts.

**Supplementary Table S2.** Principal KEGG pathways associated with lambda-cyhalothrin resistance in *Ae. aegypti* midguts.
